# Supplementary material for: Anionic phenoxy-amido rare-earth complexes as efficient catalysts for amidation of aldehydes with amines
Source: Royal Society of Chemistry journal article supplement (doi:10.1039/c5ra20285j), 2015-01-01
Supplement: c5ra20285j1.pdf [file c5ra20285j1.pdf]

## Anionic phenoxy-amido rare-earth complexes as efficient catalysts for amidation of aldehydes with amines

Chao Wang, Lingling Huang, Min Lu, Bei Zhao, Yaorong Wang,\* Yong Zhang, Qi

Shen, and Yingming Yao\*

Key Laboratory of Organic Synthesis of Jiangsu Province, College of Chemistry,  
Chemical Engineering and Materials Science, Dushu Lake Campus, Soochow  
University, Suzhou 215123, People's Republic of China

**Table S1** Crystallographic data for complexes 1-4

| Compound                                        | 1                                                                                                              | 2                                                                                                               | 3                                                                                                               | 4                                                                                                              |
|-------------------------------------------------|----------------------------------------------------------------------------------------------------------------|-----------------------------------------------------------------------------------------------------------------|-----------------------------------------------------------------------------------------------------------------|----------------------------------------------------------------------------------------------------------------|
| formula                                         | C <sub>56</sub> H <sub>86</sub> F <sub>2</sub> Li <sub>2</sub> N <sub>3</sub> O <sub>4</sub> Si <sub>2</sub> Y | C <sub>56</sub> H <sub>86</sub> F <sub>2</sub> Li <sub>2</sub> N <sub>3</sub> O <sub>4</sub> Si <sub>2</sub> Yb | C <sub>56</sub> H <sub>86</sub> F <sub>2</sub> Li <sub>2</sub> N <sub>3</sub> O <sub>4</sub> Si <sub>2</sub> Sm | C <sub>56</sub> H <sub>86</sub> F <sub>2</sub> Li <sub>2</sub> N <sub>3</sub> NdO <sub>4</sub> Si <sub>2</sub> |
| fw                                              | 1062.25                                                                                                        | 1146.38                                                                                                         | 1123.69                                                                                                         | 1117.58                                                                                                        |
| T(K)                                            | 223(2)                                                                                                         | 223(2)                                                                                                          | 223(2)                                                                                                          | 223(2)                                                                                                         |
| crystal system                                  | tetragonal                                                                                                     | tetragonal                                                                                                      | tetragonal                                                                                                      | tetragonal                                                                                                     |
| space group                                     | I4 <sub>1</sub> cd                                                                                             | I4 <sub>1</sub> cd                                                                                              | I4 <sub>1</sub> cd                                                                                              | I4 <sub>1</sub> cd                                                                                             |
| crystal size (mm <sup>3</sup> )                 | 0.90 × 0.60 × 0.40                                                                                             | 0.30 × 0.25 × 0.20                                                                                              | 0.60 × 0.38 × 0.25                                                                                              | 0.40 × 0.18 × 0.10                                                                                             |
| a (Å)                                           | 21.175(2)                                                                                                      | 21.174(1)                                                                                                       | 21.239(1)                                                                                                       | 21.269(1)                                                                                                      |
| b (Å)                                           | 21.175(2)                                                                                                      | 21.174(1)                                                                                                       | 21.239(1)                                                                                                       | 21.269(1)                                                                                                      |
| c (Å)                                           | 26.984(3)                                                                                                      | 26.954(2)                                                                                                       | 27.125(2)                                                                                                       | 27.168(2)                                                                                                      |
| V (Å <sup>3</sup> )                             | 12100(2)                                                                                                       | 12085(2)                                                                                                        | 12236(1)                                                                                                        | 12290(1)                                                                                                       |
| Z                                               | 8                                                                                                              | 8                                                                                                               | 8                                                                                                               | 8                                                                                                              |
| D <sub>calcd</sub> (g cm <sup>-3</sup> )        | 1.166                                                                                                          | 1.260                                                                                                           | 1.220                                                                                                           | 1.208                                                                                                          |
| μ (mm <sup>-1</sup> )                           | 1.052                                                                                                          | 1.636                                                                                                           | 1.047                                                                                                           | 0.932                                                                                                          |
| F(000)                                          | 4528                                                                                                           | 4776                                                                                                            | 4712                                                                                                            | 4696                                                                                                           |
| θ <sub>max</sub> (deg)                          | 25.50                                                                                                          | 27.48                                                                                                           | 27.48                                                                                                           | 25.49                                                                                                          |
| collected reflns                                | 13836                                                                                                          | 36312                                                                                                           | 24559                                                                                                           | 30256                                                                                                          |
| unique reflns                                   | 4733                                                                                                           | 6901                                                                                                            | 5573                                                                                                            | 5690                                                                                                           |
| obsd reflns [I > 2.0σ(I)]                       | 3529                                                                                                           | 5613                                                                                                            | 4818                                                                                                            | 4250                                                                                                           |
| no. of variables                                | 298                                                                                                            | 307                                                                                                             | 307                                                                                                             | 227                                                                                                            |
| GOF                                             | 1.035                                                                                                          | 1.242                                                                                                           | 1.167                                                                                                           | 1.252                                                                                                          |
| R                                               | 0.0599                                                                                                         | 0.0654                                                                                                          | 0.0500                                                                                                          | 0.0977                                                                                                         |
| wR                                              | 0.1539                                                                                                         | 0.1286                                                                                                          | 0.1186                                                                                                          | 0.1385                                                                                                         |
| largest diff peak,<br>hole (e.Å <sup>-3</sup> ) | 0.591, -0.427                                                                                                  | 0.515, -0.706                                                                                                   | 0.445, -0.612                                                                                                   | 0.391, -0.410                                                                                                  |

**Table S2** Crystallographic data for complexes **5-8**

| Compound                                        | <b>5</b>                                                                                                         | <b>6</b>                                                                                                         | <b>7</b>                                                                                                         | <b>8</b>                                                                                                         |
|-------------------------------------------------|------------------------------------------------------------------------------------------------------------------|------------------------------------------------------------------------------------------------------------------|------------------------------------------------------------------------------------------------------------------|------------------------------------------------------------------------------------------------------------------|
| formula                                         | C <sub>56</sub> H <sub>86</sub> Cl <sub>2</sub> Li <sub>2</sub> N <sub>3</sub> O <sub>4</sub> Si <sub>2</sub> Sm | C <sub>56</sub> H <sub>86</sub> Cl <sub>2</sub> Li <sub>2</sub> N <sub>3</sub> O <sub>4</sub> Si <sub>2</sub> Nd | C <sub>56</sub> H <sub>86</sub> Br <sub>2</sub> Li <sub>2</sub> N <sub>3</sub> O <sub>4</sub> Si <sub>2</sub> Sm | C <sub>56</sub> H <sub>86</sub> Br <sub>2</sub> Li <sub>2</sub> N <sub>3</sub> O <sub>4</sub> Si <sub>2</sub> Nd |
| fw                                              | 1156.59                                                                                                          | 1150.48                                                                                                          | 1245.51                                                                                                          | 1239.40                                                                                                          |
| T(K)                                            | 223(2)                                                                                                           | 223(2)                                                                                                           | 223(2)                                                                                                           | 223(2)                                                                                                           |
| crystal system                                  | tetragonal                                                                                                       | tetragonal                                                                                                       | tetragonal                                                                                                       | tetragonal                                                                                                       |
| space group                                     | <i>I</i> 4 <sub>1</sub> cd                                                                                       |
| crystal size (mm <sup>3</sup> )                 | 0.40 × 0.30 × 0.20                                                                                               | 0.80 × 0.60 × 0.40                                                                                               | 0.40 × 0.38 × 0.30                                                                                               | 0.80 × 0.60 × 0.50                                                                                               |
| <i>a</i> (Å)                                    | 21.558(2)                                                                                                        | 21.6935(8)                                                                                                       | 21.658(2)                                                                                                        | 21.687(2)                                                                                                        |
| <i>b</i> (Å)                                    | 21.558(2)                                                                                                        | 21.6935(8)                                                                                                       | 21.658(2)                                                                                                        | 21.687(2)                                                                                                        |
| <i>c</i> (Å)                                    | 26.692(2)                                                                                                        | 26.918(1)                                                                                                        | 26.562(3)                                                                                                        | 26.622(3)                                                                                                        |
| <i>V</i> (Å <sup>3</sup> )                      | 12405(2)                                                                                                         | 12668(1)                                                                                                         | 12460(2)                                                                                                         | 12522(2)                                                                                                         |
| <i>Z</i>                                        | 8                                                                                                                | 8                                                                                                                | 8                                                                                                                | 8                                                                                                                |
| <i>D</i> <sub>calcd</sub> (g cm <sup>-3</sup> ) | 1.239                                                                                                            | 1.206                                                                                                            | 1.328                                                                                                            | 1.315                                                                                                            |
| <i>μ</i> (mm <sup>-1</sup> )                    | 1.114                                                                                                            | 0.983                                                                                                            | 2.306                                                                                                            | 2.186                                                                                                            |
| <i>F</i> (000)                                  | 4840                                                                                                             | 4824                                                                                                             | 5128                                                                                                             | 5112                                                                                                             |
| <i>θ</i> <sub>max</sub> (deg)                   | 27.49                                                                                                            | 26.37                                                                                                            | 27.50                                                                                                            | 27.45                                                                                                            |
| collected reflns                                | 20011                                                                                                            | 21602                                                                                                            | 28574                                                                                                            | 25396                                                                                                            |
| unique reflns                                   | 5725                                                                                                             | 5093                                                                                                             | 6440                                                                                                             | 5836                                                                                                             |
| obsd reflns [ <i>I</i> > 2.0σ( <i>I</i> )]      | 4246                                                                                                             | 2943                                                                                                             | 5218                                                                                                             | 4427                                                                                                             |
| no. of variables                                | 315                                                                                                              | 297                                                                                                              | 318                                                                                                              | 317                                                                                                              |
| GOF                                             | 1.186                                                                                                            | 1.014                                                                                                            | 1.240                                                                                                            | 1.099                                                                                                            |
| <i>R</i>                                        | 0.0737                                                                                                           | 0.0441                                                                                                           | 0.0680                                                                                                           | 0.0479                                                                                                           |
| <i>wR</i>                                       | 0.1341                                                                                                           | 0.0849                                                                                                           | 0.0986                                                                                                           | 0.1099                                                                                                           |
| largest diff peak, hole (e.Å <sup>-3</sup> )    | 0.439, -0.785                                                                                                    | 0.608, -0.380                                                                                                    | 0.879, -0.771                                                                                                    | 0.835, -0.858                                                                                                    |

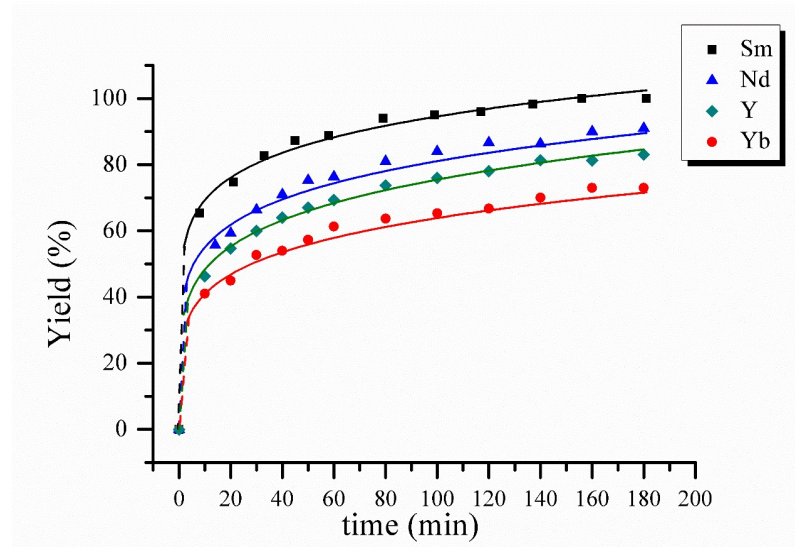

**Fig. S1.** The yield vs. reaction time plots for the amidation of benzaldehyde with *N*-methyl-benzylamine catalyzed by complexes **1** (Y), **2** (Yb), **3** (Sm) and **4** (Nd). Procedure: The catalyst (9.16 mg, 0.01 mmol) and *d*<sub>8</sub>-THF (0.5 mL) was added to the NMR tube, and then *N*-methyl-benzylamine was added (0.065 mL, 0.5 mmol). The solution was kept for half an hour at room temperature, and then benzaldehyde was

added (0.15 mL, 1.5 mmol). Ferrocene (0.05 mmol, 9.3 mg) was used as the internal standard. The reaction was monitored by  $^1\text{H}$  NMR spectroscopy for 3 h.

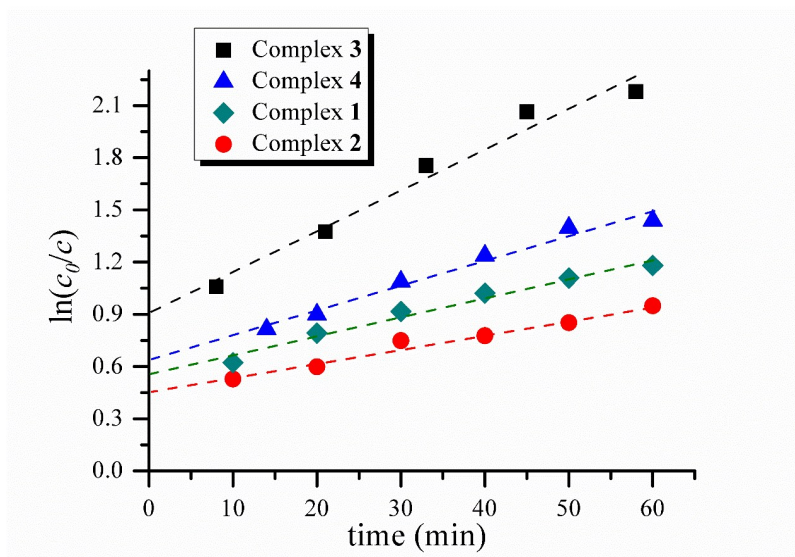

**Fig. S2** Kinetics of the amidation of benzaldehyde with *N*-methyl-benzylamine catalyzed by complexes **1-4** in  $d_8$ -THF. (a) Complex **1**,  $k_{\text{app}} = 0.011 \text{ min}^{-1}$  (linear fit,  $R^2 = 0.9715$ ); (b) complex **2**,  $k_{\text{app}} = 0.0082 \text{ min}^{-1}$  (linear fit,  $R^2 = 0.9711$ ); (c) complex **3**,  $k_{\text{app}} = 0.0236 \text{ min}^{-1}$  (linear fit,  $R^2 = 0.9623$ ); (d) complex **4**,  $k_{\text{app}} = 0.0144 \text{ min}^{-1}$  (linear fit,  $R^2 = 0.9609$ ).

### Spectroscopic data for the products

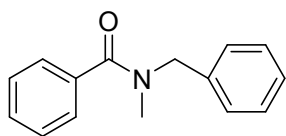

*N*-Benzyl-*N*-methylbenzamide (**13aa**). Purified by column chromatography (ethyl acetate: petroleum ester = 1:7). Colorless oil :  $^1\text{H}$  NMR (400 MHz,  $\text{CDCl}_3$ )  $\delta = 2.85$  (s, 1.5H), 3.02 (s, 1.5H), 4.51 (s, 1H), 4.76 (s, 1H), 7.16-7.47 (m, 10H);  $^{13}\text{C}$  NMR (100 MHz,  $\text{CDCl}_3$ )  $\delta = 33.1, 36.9, 50.7, 55.1, 126.7, 126.9, 127.4, 128.1, 128.3, 128.6, 128.7, 129.5, 136.1, 136.5, 136.9, 171.5, 172.2$ .

*N*-Benzyl-*N*-methyl-4-fluorobenzamide (**13ba**). Purified by column chromatography (ethyl acetate: petroleum ester = 1:7). Colorless oil :  $^1\text{H}$  NMR (400 MHz,  $\text{CDCl}_3$ )  $\delta = 2.88$  (s, 1.5H), 3.04 (s, 1.5H), 4.52 (s, 1H), 4.75 (s, 1H), 7.08-7.49 (m, 9H);  $^{13}\text{C}$  NMR

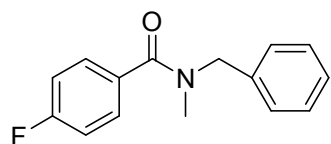

(100 MHz,  $\text{CDCl}_3$ )  $\delta$  = 33.4, 36.9, 50.8, 55.1, 115.3, 115.6, 126.5, 127.6, 128.2, 128.8, 129.2, 132.1, 136.4, 136.8, 161.7, 165.0, 170.6, 171.4.

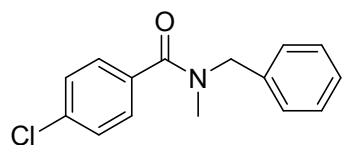

N-Benzyl-N-methyl-4-chlorobenzamide (**13ca**). Purified by column chromatography (ethyl acetate: petroleum ester = 1:7). Colorless oil :  $^1\text{H}$  NMR (400 MHz,  $\text{CDCl}_3$ )  $\delta$  = 2.85 (s, 1.5H), 3.02 (s, 1.5H), 4.49 (s, 1H), 4.73 (s, 1H), 7.15-7.38 (m, 9H);  $^{13}\text{C}$  NMR (100 MHz,  $\text{CDCl}_3$ )  $\delta$  = 33.3, 36.9, 50.8, 55.1, 126.5, 127.6, 128.1, 128.3, 128.4, 128.6, 132.9, 134.3, 135.7, 136.2, 136.6, 139.6, 170.5, 171.2.

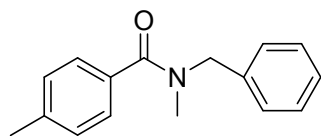

N-Benzyl-N-methyl-4-methylbenzamide (**13da**). Purified by column chromatography (ethyl acetate: petroleum ester = 1:7). White solid : mp 67–68 °C;  $^1\text{H}$  NMR (400 MHz,  $\text{CDCl}_3$ )  $\delta$  = 2.36 (s, 3H), 2.90 (s, 1.5H), 2.97 (s, 1.5H), 4.52 (s, 1H), 4.73 (s, 1H), 7.19-7.38 (m, 9H);  $^{13}\text{C}$  NMR (100 MHz,  $\text{CDCl}_3$ )  $\delta$  = 21.6, 33.4, 37.3, 51.0, 55.4, 126.9, 127.1, 127.3, 127.7, 128.3, 128.9, 129.2, 133.5, 137.0, 137.3, 139.9, 172.9

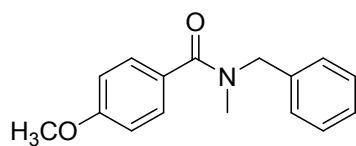

N-Benzyl-N-methyl-4-methoxybenzamide(**13ea**).Purified by column chromatography (ethyl acetate : petroleum ester = 1:7 ). Colorless oil :  $^1\text{H}$  NMR (400 MHz,  $\text{CDCl}_3$ )  $\delta$  = 2.93 (s, 1.5H), 2.99 (s, 1.5H), 3.81 (s, 3H), 4.59 (s, 1H), 4.73 (s, 1H), 6.88-7.46 (m, 9H);  $^{13}\text{C}$  NMR (100 MHz,  $\text{CDCl}_3$ )  $\delta$  = 33.2, 37.0, 51.0, 55.1, 64.7, 113.5, 126.5, 127.4, 128.1, 128.4, 128.7, 128.9, 136.9, 160.6.

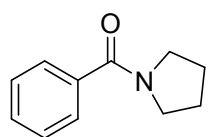

N-Benzoylpyrrolidine (**13ab**). Purified by column chromatography (ethyl acetate: petroleum ester = 1: 3 ). Colorless oil:  $^1\text{H}$  NMR (400 MHz,  $\text{CDCl}_3$ )  $\delta$  = 1.84-2.00 (m, 4H), 3.42 (t,  $J$  = 6.8 Hz, 2H), 3.65 (t,  $J$  = 6.8 Hz, 2H), 7.39-7.40 (m, 3H), 7.51-7.52 (m, 2H);  $^{13}\text{C}$  NMR (100 MHz,  $\text{CDCl}_3$ )  $\delta$  = 24.4, 26.4, 46.1, 49.6, 127.0, 128.2, 129.7, 137.2, 169.7.

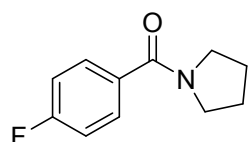

N-(*p*-Fluorobenzoyl)pyrrolidine (**13bb**). Purified by column chromatography (ethyl acetate: petroleum ester = 1:3). White solid: mp 89-90 °C;  $^1\text{H}$  NMR (400 MHz,  $\text{CDCl}_3$ )  $\delta$  = 1.93 (brs, 4H), 3.55 (brs, 4H), 7.07-7.12 (m, 2H), 7.53-7.57 (m, 2H);  $^{13}\text{C}$  NMR (100 MHz,  $\text{CDCl}_3$ )  $\delta$  = 24.4, 26.3, 46.3, 49.7, 115.1, 115.4, 129.3, 129.4, 133.1, 133.2, 161.7, 165.0, 166.6.

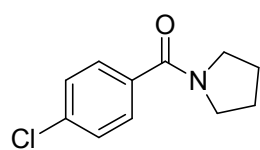

N-(*p*-Chlorobenzoyl)pyrrolidine (**13cb**). Purified by column chromatography (ethyl acetate: petroleum ester = 1 : 3). White solid: mp 74-76 °C;  $^1\text{H}$  NMR (400 MHz,  $\text{CDCl}_3$ )  $\delta$  = 1.85-2.00 (m, 4H), 3.41 (t,  $J$  = 6.4 Hz, 2H), 3.63 (t,  $J$  = 6.8 Hz, 2H), 7.28-7.48 (m, 4H);  $^{13}\text{C}$  NMR (100 MHz,  $\text{CDCl}_3$ )  $\delta$  = 24.3, 26.3, 46.2, 49.5, 128.4, 128.5, 135.4, 135.7, 166.4.

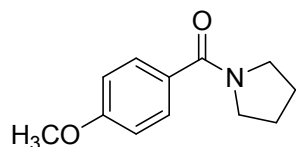

N-(*p*-Methoxybenzoyl)pyrrolidine (**13eb**). Purified by column chromatography (ethyl acetate: petroleum ester = 1:3). White solid: mp 78-79 °C;  $^1\text{H}$  NMR (400 MHz,  $\text{CDCl}_3$ )  $\delta$  = 1.89 (t,  $J$  = 6.8 Hz, 4H), 3.53 (t,  $J$  = 6.8 Hz, 4H), 3.80 (s, 3H), 6.87 (m, 2H), 7.49 (m, 2H);  $^{13}\text{C}$  NMR (100 MHz,  $\text{CDCl}_3$ )  $\delta$  = 24.5, 26.4, 46.3, 49.7, 55.3, 113.3, 129.1, 129.3, 160.7, 169.4.

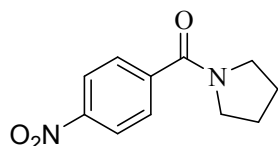

N-(*p*-Nitrobenzoyl)pyrrolidine (**13fb**). Purified by column chromatography (ethyl acetate: petroleum ester = 1:6). White solid : mp 75-76 °C;  $^1\text{H}$  NMR (400 MHz,  $\text{CDCl}_3$ )  $\delta$  = 1.87-

1.98 (m, 4H), 3.34-3.37 (m, 2H), 3.62-3.65 (m, 2H), 7.64-7.66 (m, 2H), 8.23-8.25 (m, 2H);  $^{13}\text{C}$  NMR (100 MHz,  $\text{CDCl}_3$ )  $\delta$  = 25.1, 27.1, 47.1, 50.2, 124.4, 128.9, 143.9, 149.1, 168.1.

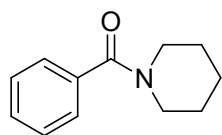

N-Benzoylpiperidine (**13ac**). Purified by column chromatography (ethyl acetate: petroleum ester = 1:7). Colorless oil:  $^1\text{H}$  NMR (400 MHz,  $\text{CDCl}_3$ )  $\delta$  = 1.52 (brs, 2H), 1.68 (brs, 4H), 3.34 (brs, 2H), 3.72 (brs, 2H), 7.39 (m, 5H);  $^{13}\text{C}$  NMR (100 MHz,  $\text{CDCl}_3$ )  $\delta$  = 24.5, 25.5, 26.4, 43.0, 48.7, 126.7, 128.3, 129.3, 136.4, 170.2.

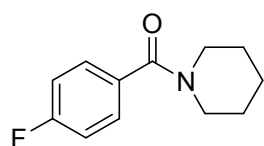

N-(*p*-Fluorobenzoyl)piperidine (**13bc**). Purified by column chromatography (ethyl acetate: petroleum ester = 1:7). White solid : mp56-57 °C;  $^1\text{H}$  NMR (400 MHz,  $\text{CDCl}_3$ )  $\delta$  = 1.54 (brs, 2H), 1.68 (brs, 4H), 3.35 (brs, 2H), 3.69 (brs, 2H), 7.07-7.11 (m, 2H), 7.39-7.42 (m, 2H);  $^{13}\text{C}$  NMR (100 MHz,  $\text{CDCl}_3$ )  $\delta$  = 24.5, 25.5, 26.4, 43.2, 48.7, 115.2, 115.5, 128.9, 129.0, 132.3, 132.4, 161.5, 164.8, 169.3.

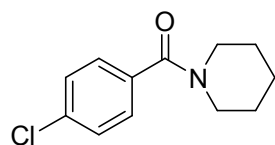

N-(*p*-Chlorobenzoyl)piperidine (**13cc**). Purified by column chromatography (ethyl acetate: petroleum ester = 1:7). White solid : mp79-80 °C:  $^1\text{H}$  NMR (400 MHz,  $\text{CDCl}_3$ )  $\delta$  = 1.52 (brs, 2H), 1.68 (brs, 4H), 3.33 (brs, 2H), 3.69 (brs, 2H), 7.28-7.39 (m, 4H);  $^{13}\text{C}$  NMR (100 MHz,  $\text{CDCl}_3$ )  $\delta$  = 24.5, 25.5, 26.5, 43.2, 48.7, 128.2, 128.3, 128.5, 128.6, 133.1, 134.7, 135.4, 139.4, 169.2.

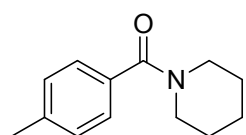

N-(*p*-Methylbenzoyl)piperidine (**13dc**). Purified by column chromatography (ethyl acetate: ester = 1:7). Colorless oil :  $^1\text{H}$  NMR (400MHz,  $\text{CDCl}_3$ )  $\delta$  = 1.52-1.67 (brs, 6H), 2.37 (s, 3H), 3.36 (s, 2H), 3.69 (s, 2H), 7.18-7.19 (m, 2H), 7.28-7.30 (m, 2H);  $^{13}\text{C}$  NMR (100MHz,  $\text{CDCl}_3$ )  $\delta$  = 16.8, 20.1, 21.1, 21.9, 38.6, 44.2, 122.3, 124.4, 128.9, 134.9, 165.8.

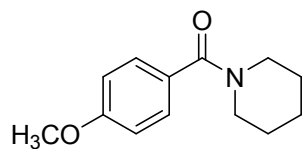

*N*-(*p*-Methoxybenzoyl)piperidine (**13ec**). Purified by column chromatography (ethyl acetate: petroleum ester = 1:7).

Colorless oil :  $^1\text{H}$  NMR (400 MHz,  $\text{CDCl}_3$ )  $\delta$  = 1.60 (brs, 2H), 1.67 (brs, 4H), 3.45 (brs, 2H), 3.64 (brs, 2H), 3.82 (s, 3H), 6.89-6.91 (m, 2H), 7.36-7.38 (m, 2H);  $^{13}\text{C}$  NMR (100 MHz,  $\text{CDCl}_3$ )  $\delta$  = 24.5, 26.0, 43.2, 48.7, 55.2, 113.5, 128.5, 128.7, 160.4, 170.2.

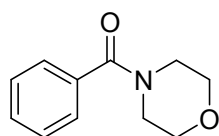

*N*-Benzoylmorpholine (**13ad**). Purified by column chromatography (ethyl acetate: petroleum ester = 1:5). Colorless

oil:  $^1\text{H}$  NMR (400 MHz,  $\text{CDCl}_3$ )  $\delta$  = 3.44-3.78 (m, 8H), 7.41 (m, 5H);  $^{13}\text{C}$  NMR (100 MHz,  $\text{CDCl}_3$ )  $\delta$  = 43.1, 48.8, 67.6, 127.8, 129.3, 130.6, 136.1, 171.2.

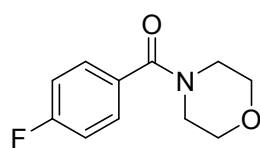

*N*-(*p*-Fluorobenzoyl)morpholine (**13bd**). Purified by column chromatography (ethyl acetate: petroleum ester = 1:5).

Colorless oil :  $^1\text{H}$  NMR (400 MHz,  $\text{CDCl}_3$ )  $\delta$  = 3.49-3.70 (m, 8H), 7.08-7.12 (m, 2H), 7.39-7.43(m, 2H);  $^{13}\text{C}$  NMR (100 MHz,  $\text{CDCl}_3$ )  $\delta$  = 43.1, 48.4, 67.0, 115.7, 116.0, 129.6, 129.7, 131.5, 162.0, 165.3, 169.7.

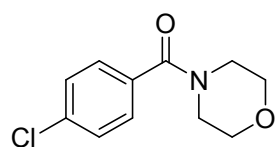

*N*-(*p*-Chlorobenzoyl)morpholine (**13cd**). Purified by column chromatography (ethyl acetate: petroleum ester = 1:5). White

solid: mp 76 °C;  $^1\text{H}$  NMR (400 MHz,  $\text{CDCl}_3$ )  $\delta$  = 3.45-3.73 (m, 8H), 7.34-7.40 (m, 4H);  $^{13}\text{C}$  NMR (100 MHz,  $\text{CDCl}_3$ )  $\delta$  = 42.8, 48.5, 67.0, 128.9, 129.0, 133.8, 136.2, 169.5.

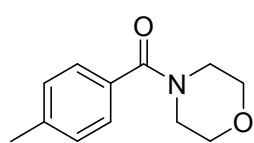

*N*-(*p*-Methylbenzoyl)morpholine (**13dd**). Purified by column chromatography (ethyl acetate: petroleum ester = 1:5). White

solid : mp 76-77 °C :  $^1\text{H}$  NMR (400 MHz,  $\text{CDCl}_3$ )  $\delta$  = 2.36 (s, 3H), 3.67 (m, 8H), 7.19-7.21 (m, 2H); 7.28-7.30 (m, 2H);  $^{13}\text{C}$  NMR (100 MHz,  $\text{CDCl}_3$ )  $\delta$  = 21.6, 42.8, 48.4, 67.1, 127.4, 129.3, 132.5, 140.3, 170.8.

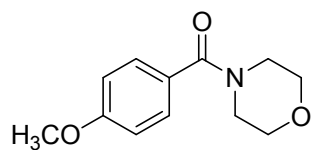

*N*-(*p*-Methoxybenzoyl)morpholine (**13ed**). Purified by column chromatography (ethyl acetate: petroleum ester = 1:5). Colorless oil :  $^1\text{H}$  NMR (400 MHz,  $\text{CDCl}_3$ )  $\delta$  = 3.63-3.67 (m, 8H), 3.81 (s, 3H); 6.90 (m, 2H); 7.36 (m, 2H);  $^{13}\text{C}$  NMR (100 MHz,  $\text{CDCl}_3$ )  $\delta$  = 43.3, 48.4, 55.8, 67.3, 114.1, 127.6, 129.5, 161.1, 170.6.

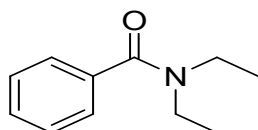

*N*-diethylbenzamide (**13ae**). Purified by column chromatography (ethyl acetate: petroleum ester = 1:15). Colorless oil,  $^1\text{H}$  NMR (400 MHz,  $\text{CDCl}_3$ )  $\delta$  = 1.17 (d,  $J$  = 57.5 Hz, 6H), 3.40 (d,  $J$  = 117.7 Hz, 4H), 7.31-7.41 (m, 5H);  $^{13}\text{C}$  NMR (100 MHz,  $\text{CDCl}_3$ )  $\delta$  = 13.0, 14.3, 39.3, 43.4, 126.3, 126.9, 128.5, 129.2, 137.4, 171.4.

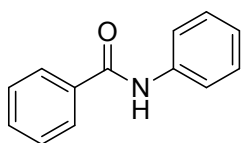

Phenylbenzamide (**13ah**). Purified by column chromatography (ethyl acetate: petroleum ester = 1:15). White solid: mp 162-163 °C;  $^1\text{H}$  NMR (400 MHz,  $\text{CDCl}_3$ )  $\delta$  = 7.14-7.89 (m, 10H);  $^{13}\text{C}$  NMR (100 MHz,  $\text{CDCl}_3$ )  $\delta$  = 120.2, 124.6, 127.0, 128.8, 129.1, 131.8, 134.9, 137.9, 165.7.

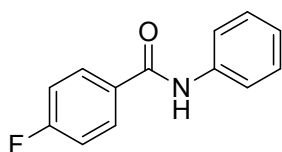

*N*-Phenyl-4-fluorobenzamide (**13bh**). Purified by column chromatography (ethyl acetate: petroleum ester = 1:15). White solid : mp 188-189 °C;  $^1\text{H}$  NMR (400 MHz, DMSO)  $\delta$  = 7.07-7.12 (m, 1H), 7.32-7.39 (m, 4H), 7.74-7.77 (m, 2H), 8.01-8.05 (m, 2H), 10.25 (m, 1H);  $^{13}\text{C}$  NMR (100 MHz, DMSO)  $\delta$  = 115.9, 116.2, 121.1, 124.4, 129.3, 131.1, 132.1, 139.7, 163.1, 165.1, 166.4.



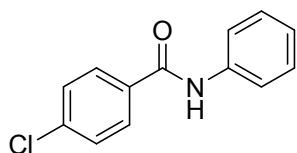

N-Phenyl-4-chlorobenzamide (**13ch**). Purified by column chromatography (ethyl acetate : petroleum ester = 1:15). White solid : mp 202-203 °C; <sup>1</sup>H NMR (400 MHz, CDCl<sub>3</sub>) δ = 7.17 (m, 1H), 7.36-7.40 (m, 2H), 7.47 (d, 2H), 7.61-7.64 (m, 2H), 7.82 (d, 2H); <sup>13</sup>C NMR (100 MHz, DMSO) δ = 164.2, 138.9, 131.1, 130.1, 128.4, 123.5, 120.2, 115.2, 115.0

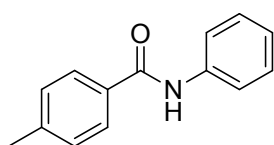

N-Phenyl-4-methylbenzamide (**13dh**). Purified by column chromatography (ethyl acetate : petroleum ester = 1:15). White solid : mp 149-150 °C; <sup>1</sup>H NMR (400 MHz, CDCl<sub>3</sub>) δ = 2.43 (s, 3H), 7.14 (m, 1H), 7.29 (m, 2H), 7.35-7.40 (m, 2H), 7.63-7.65 (d, 2H), 7.78 (m, 2H); <sup>13</sup>C NMR (100 MHz, CDCl<sub>3</sub>) δ = 21.7, 120.7, 124.5, 127.6, 129.2, 129.6, 132.3, 138.4, 142.4, 166.1

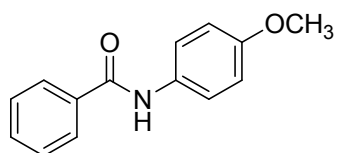

*N*-(*p*-Methoxy)phenylbenzamide (**13ai**). Purified by column chromatography (ethyl acetate: petroleum ester = 1:15 ). White solid : mp 160-161 °C; <sup>1</sup>H NMR (400 MHz, CDCl<sub>3</sub>) δ = 3.82 (s, 3H), 6.92 (m, 2H), 7.47-7.56 (m, 5H), 7.75 (brs, 1H), 7.87 (m, 2H); <sup>13</sup>C NMR (100 MHz, CDCl<sub>3</sub>) δ = 55.5, 114.2, 122.0, 126.9, 128.7, 130.9, 131.7, 135.0, 156.6, 165.6.

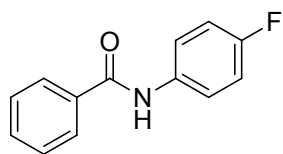

*N*-(*p*-Fluoro)phenylbenzamide (**13aj**). Purified by column chromatography (ethyl acetate : petroleum ester = 1 : 15). White solid : mp 185-186 °C, <sup>1</sup>H NMR (400 MHz, DMSO) δ = 7.06-7.09 (m, 2H) , 7.48-7.62 (m, 5H), 7.79 (s, 1H), 7.87 (m, 2H); <sup>13</sup>C NMR (100 MHz, DMSO) δ = 115.7, 116.0, 122.8, 123.0, 128.3, 129.1, 132.3, 135.5, 136.2, 166.1.

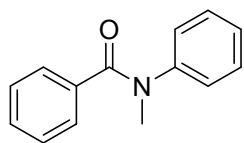

N-Phenyl-N-methylbenzamide (**13ak**). Purified by column chromatography (ethyl acetate: petroleum ester = 1: 7). White solid: mp 104-106 °C, <sup>1</sup>H NMR (400 MHz, CDCl<sub>3</sub>) δ = 3.43 (s, 3H), 6.97 (d, *J* = 7.7 Hz, 2H), 7.01-7.19 (m, 6H), 7.24(d, *J* = 1.3 Hz, 2H); <sup>13</sup>C NMR (100 MHz, CDCl<sub>3</sub>) δ = 38.2, 126.3, 126.7, 127.5, 128.5, 129.0, 129.4, 135.7, 144.7, 170.4.

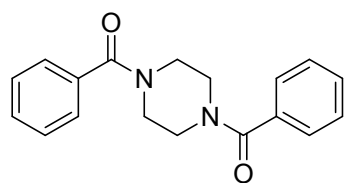

N,N'-Dibenzoylpiperazine (**13am**). Purified by column chromatography (ethyl acetate : petroleum ester = 1 : 1). White solid: mp 196-197 °C , <sup>1</sup>H NMR (400 MHz, CDCl<sub>3</sub>) δ = 3.64 (d, *J* = 87.3 Hz, 8H), δ = 7.41 (s, 10H) ; <sup>13</sup>C NMR (100 MHz, CDCl<sub>3</sub>) δ = 48.1, 127.6, 129.2, 130.7, 135.7, 171.2.

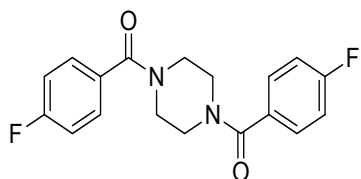

N,N'-di(*p*-Fluorobenzoyl)piperazine (**13bm**). Purified by column chromatography (ethyl acetate: petroleum ester = 1 : 1). White solid: mp 258 - 259 °C, <sup>1</sup>H NMR (400 MHz, CDCl<sub>3</sub>) δ = 3.63 (brs, 8H), 7.11 (m, 4H), 7.43 (m, 4H); <sup>13</sup>C NMR (100 MHz, DMSO) δ = 26.5, 132.8, 134.6, 138.1, 145.2, 175.2.

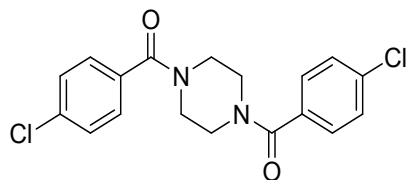

N,N'-di(*p*-Chlorobenzoyl)piperazine (**13cm**). Purified by column chromatography (ethyl acetate: petroleum ester = 1 : 1). White solid: mp 223-224 °C, <sup>1</sup>H NMR (300 MHz, DMSO) δ = 3.63 (m, 8H), 7.49 (d, *J* = 12.2 Hz, 8H); <sup>13</sup>C NMR (75 MHz, DMSO) δ = 41.7, 128.6, 129.0, 134.4, 168.2.

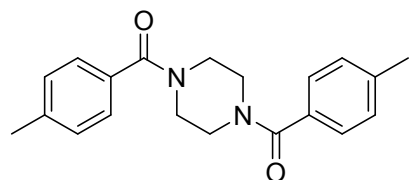

N,N'-di(*p*-Methylbenzoyl)piperazine (**13dm**). Purified by column chromatography (ethyl acetate:

petroleum ester = 1 : 1). White solid: mp 213 -214 °C, <sup>1</sup>H NMR (300 MHz, DMSO) δ = 2.39 (s, 6H), 3.55 (brs, 8H), δ 7.34 (d, *J* = 13.6 Hz, 8H); <sup>13</sup>C NMR (75 MHz, DMSO) δ = 20.9, 42.0, 127.2, 128.9, 132.7, 139.4, 169.3.

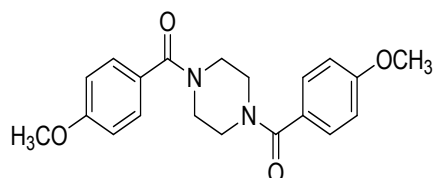

N,N'-di(*p*-Methoxybenzoyl)piperazine (**13em**).

Purified by column chromatography (ethyl acetate: petroleum ester = 1 : 1). White solid: mp 204-205 °C, <sup>1</sup>H NMR (400 MHz, CDCl<sub>3</sub>) δ = 3.65(s, 8H), 3.83 (d, *J* = 6.5 Hz, 6H), 6.92 (d, *J* = 8.6 Hz, 4H), 7.40 (d, *J* = 8.6 Hz, 4H); <sup>13</sup>C NMR (100 MHz, CDCl<sub>3</sub>) δ = 55.4, 113.9, 127.2, 129.3, 161.0, 170.7.

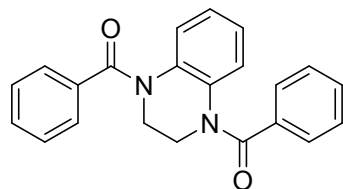

N,N'-diBenzoyl-1,2,3,4-tetrahydro-quinoline (**13an**).

Purified by column chromatography (ethyl acetate: petroleum ester = 1: 5). White solid : mp 205 -207 °C, <sup>1</sup>H NMR (400 MHz, CDCl<sub>3</sub>) δ = 4.15 (s, 4H), 6.76 (s, 4H), 7.36 (t, *J* = 7.4 Hz, 4H), 7.44 (t, *J* = 7.3 Hz, 2H), 7.49 (d, *J* = 8.1 Hz, 4H); <sup>13</sup>C NMR (100 MHz, CDCl<sub>3</sub>) δ = 46.3, 124.8, 125.4, 128.5, 128.7 131.0, 133.7, 135.2, 169.6.

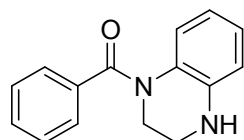

1-Benzoyl-1,2,3,4-tetrahydro-quinoline (**13an-2**). Purified by column chromatography (ethyl acetate: petroleum ester = 1: 5).

White solid : mp 161 -163 °C, <sup>1</sup>H NMR (400 MHz, CDCl<sub>3</sub>) δ = 3.52 (s, 2H), 3.96 (s, 2H), 4.16 (s, 1H), 6.36 (s, 1H), 6.58 (d, *J* = 8.0 Hz, 2H), 6.84 (m, 1H) , 7.33 (m, 3H), 7.45 (d, *J* = 7.6 Hz, 2H); <sup>13</sup>C NMR (100 MHz, CDCl<sub>3</sub>) δ = 42.8, 114.6, 116.3, 124.7, 125.2, 125.8, 128.2, 128.7, 130.2, 135.9, 137.1.
